# Supplementary material for: Severe Expressive-Language Delay Related to Duplication of the Williams–Beuren Locus
Source: Atypon-hosted journal article supplement (doi:10.1056/nejmoa051962), 2005-10-20

## Supplementary Appendix

This appendix has been provided by the authors to give readers additional information about their work.

Supplement to: Somerville MJ, Mervis CB, Young EJ, et al. Severe expressive-language delay related to duplication of the Williams–Beuren locus. *N Engl J Med* 2005;353:1694-701.

## **SUPPLEMENTARY APPENDIX**

### ***Negative Medical History***

An abdominal ultrasound, electrocardiogram, and chest radiograph performed at 13 months of age were normal and Patient 1 was successfully treated for iron deficiency anemia. An MRI at age six years, five months and an EEG at age seven years revealed no significant abnormalities. Assessment in the genetics clinic at age seven years showed a very sociable, hyperactive boy with mild dysmorphic features. Chromosome analysis at 550 band resolution was normal, as were the following investigations: quantitative amino acids, thyroid-stimulating hormone, routine electrolytes and hematology, urine mucopolysaccharide screen, oligosaccharide screen, specific molecular studies to detect the fragile X, X-linked alpha thalassemia-mental retardation and velocardiofacial syndromes.

### ***Clinical Evaluation of Language Fundamentals – Preschool Version 2<sup>nd</sup> ed.***

Patient 1's language abilities were too limited for him to complete the age-appropriate version of the Clinical Evaluation of Language Fundamentals (CELF). Therefore, the CELF-Preschool 2 [12] was administered. On the receptive subtests, Patient 1's responses indicated that he understood a variety of grammatical constructions, was able to categorize pictures of objects, and understood simple relational language. Overall, his performance was consistent with a moderate language impairment. In contrast, Patient 1 did not answer a single question correctly on the three primary expressive subtests: recall of sentences, expressive vocabulary, and word structure, indicating very severe expressive language impairment.

**Table 1. Genotyping analysis of markers from the Williams-Beuren syndrome region**

| FAMILY MEMBER                          | MARKER                 | ALLELE 1           | ALLELE 2   | ALLELE 3   |            |
|----------------------------------------|------------------------|--------------------|------------|------------|------------|
|                                        |                        | Size in base pairs |            |            |            |
| <b>Patient 1</b>                       | D7S653                 | <b>216</b>         | <b>222</b> |            |            |
| Sister                                 |                        | 222                | 222        |            |            |
| Father                                 |                        | 216                | 222        |            |            |
| Mat GF                                 |                        | 222                | 222        |            |            |
| Mat GM                                 |                        | 222                | 222        |            |            |
| <b>Patient 1</b>                       |                        | D7S672             | <b>140</b> | <b>150</b> |            |
| Sister                                 | 144                    |                    | 144        |            |            |
| Father                                 | 144                    |                    | 150        |            |            |
| Maternal Grandfather                   | 140                    |                    | 140        |            |            |
| Maternal Grandmother                   | 142                    |                    | 144        |            |            |
| <b>Williams-Beuren syndrome region</b> | <b>Patient 1</b>       |                    | D7S2476    | <b>156</b> | <b>162</b> |
|                                        | Sister                 | 156                |            | 168        |            |
|                                        | Father                 | 156                |            | 156        |            |
|                                        | Mother (reconstructed) | 162                |            | 168        |            |
|                                        | Maternal Grandfather   | 154                |            | 162        |            |
|                                        | Maternal Grandmother   | 154                |            | 168        |            |
|                                        | <b>Patient 1</b>       | D7S3194            | <b>202</b> | <b>204</b> | <b>208</b> |
|                                        | Sister                 |                    | 204        | 204        |            |
|                                        | Father                 |                    | 202        | 204        |            |
|                                        | Mother (reconstructed) |                    | 204        | 208        |            |
|                                        | Maternal Grandfather   |                    | 208        | 208        |            |
|                                        | Maternal Grandmother   |                    | 196        | 204        |            |
|                                        | <b>Patient 1</b>       | D7S1870            | <b>134</b> | <b>132</b> | <b>136</b> |
|                                        | Sister                 |                    | 134        | 136        |            |
|                                        | Father                 |                    | 134        | 134        |            |
|                                        | Mother (reconstructed) |                    | 132        | 136        |            |
|                                        | Maternal Grandfather   |                    | 128        | 132        |            |
|                                        | Maternal Grandmother   |                    | 134        | 136        |            |
| <b>Patient 1</b>                       | D7S2455                | <b>210</b>         | <b>210</b> |            |            |
| Sister                                 |                        | 206                | 210        |            |            |
| Father                                 |                        | 206                | 210        |            |            |
| Maternal Grandfather                   |                        | 202                | 202        |            |            |
| Maternal Grandmother                   |                        | 208                | 210        |            |            |
| <b>Patient 1</b>                       |                        | D7S675             | <b>207</b> | <b>207</b> |            |
| Sister                                 | 207                    |                    | 211        |            |            |
| Father                                 | 207                    |                    | 211        |            |            |
| Maternal Grandfather                   | 209                    |                    | 211        |            |            |
| Maternal Grandmother                   | 207                    |                    | 209        |            |            |

Markers were amplified using fluorescently labelled primers and the sizes of the resulting products determined using an Applied Biosystems 3730xl DNA analyzer and GeneMapper 3.5 software. Alleles not present in the father, but present in the maternal grandparents (and therefore inherited from the mother) are shaded. The mother's genotype at each marker has been reconstructed from the genotypes of her parents and offspring.

**Table 2. Expression analysis of genes from the Williams-Beuren syndrome region**

| Gene    | Comparative Expression Ratio (vs. control group n=9) |                         |
|---------|------------------------------------------------------|-------------------------|
|         | WBS Persons (n=9)                                    | Patient 1 (duplication) |
|         | Mean $\pm$ SEM                                       | Mean $\pm$ SD           |
| BAZ1B   | 0.42 ( $\pm$ 0.07)                                   | 1.47 ( $\pm$ 0.15)      |
| LIMK1   | 0.50 ( $\pm$ 0.22)                                   | 1.57 ( $\pm$ 0.17)      |
| WBSCR1  | 0.45 ( $\pm$ 0.05)                                   | 1.35 ( $\pm$ 0.10)      |
| WBSCR5  | 0.38 ( $\pm$ 0.17)                                   | 1.05 ( $\pm$ 0.28)      |
| RFC2    | 0.50 ( $\pm$ 0.06)                                   | 1.30 ( $\pm$ 0.02)      |
| GTF2I   | 0.56 ( $\pm$ 0.08)                                   | 1.58 ( $\pm$ 0.13)      |
| WBSCR16 | 0.99 ( $\pm$ 0.12)                                   | 0.94 ( $\pm$ 0.37)      |

All samples were run in triplicate and the experiment was repeated twice with consistent results. 5  $\mu$ g of total RNA extracted from transformed lymphoblast cell lines was DNase treated and reverse transcribed in a 20  $\mu$ l reaction with random hexamers using SuperScript™ First-Strand Synthesis System (Invitrogen). Real-time PCR was carried out using an ABI Prism7900HT sequence detection system with 10  $\mu$ l reactions containing 5 ng of template for 45 cycles of amplification. Primer sequences are available on our website (<http://www.utoronto.ca/osborne/>). *CYLN2* and *GTF2IRD1* expression was below the limit of reliable detection. Real-time PCR experiments were normalized using *ACTB*, *HPRT1* and *STARD7* as references. Each plate contained a water control and serially diluted concentrations of control genomic DNA (range 10-0.62 ng) from which a standard curve was generated for transcript quantification. Comparative expression ratios were calculated by dividing the averaged normalized values for each of the test genes by the normalized test gene values for the control group.

## **FIGURE LEGEND**

### **Figure 1. Schematic of polymorphic marker analysis in Patient 1's family**

The results of polymorphic marker analysis for the three informative markers within the WBS region are shown for Patient 1, his parents and maternal grandparents. The mothers' haplotype is inferred from that of her parents and of Patient 1. The markers used were *D7S2476*, *D7S3194* and *D7S1870*. Markers were amplified using fluorescently labelled primers and the sizes of the resulting products determined using an Applied Biosystems 3730xl DNA analyzer and GeneMapper 3.5 software.

Boxed haplotypes inherited by Patient 1 are shown in different colors for the grandmother and the grandfather. It can clearly be seen that the haplotypes corresponding to the duplicated 7q.23 region in Patient 1 were inherited from different grandparents, indicating that the unequal interchromosomal meiotic recombination occurred in the mother.

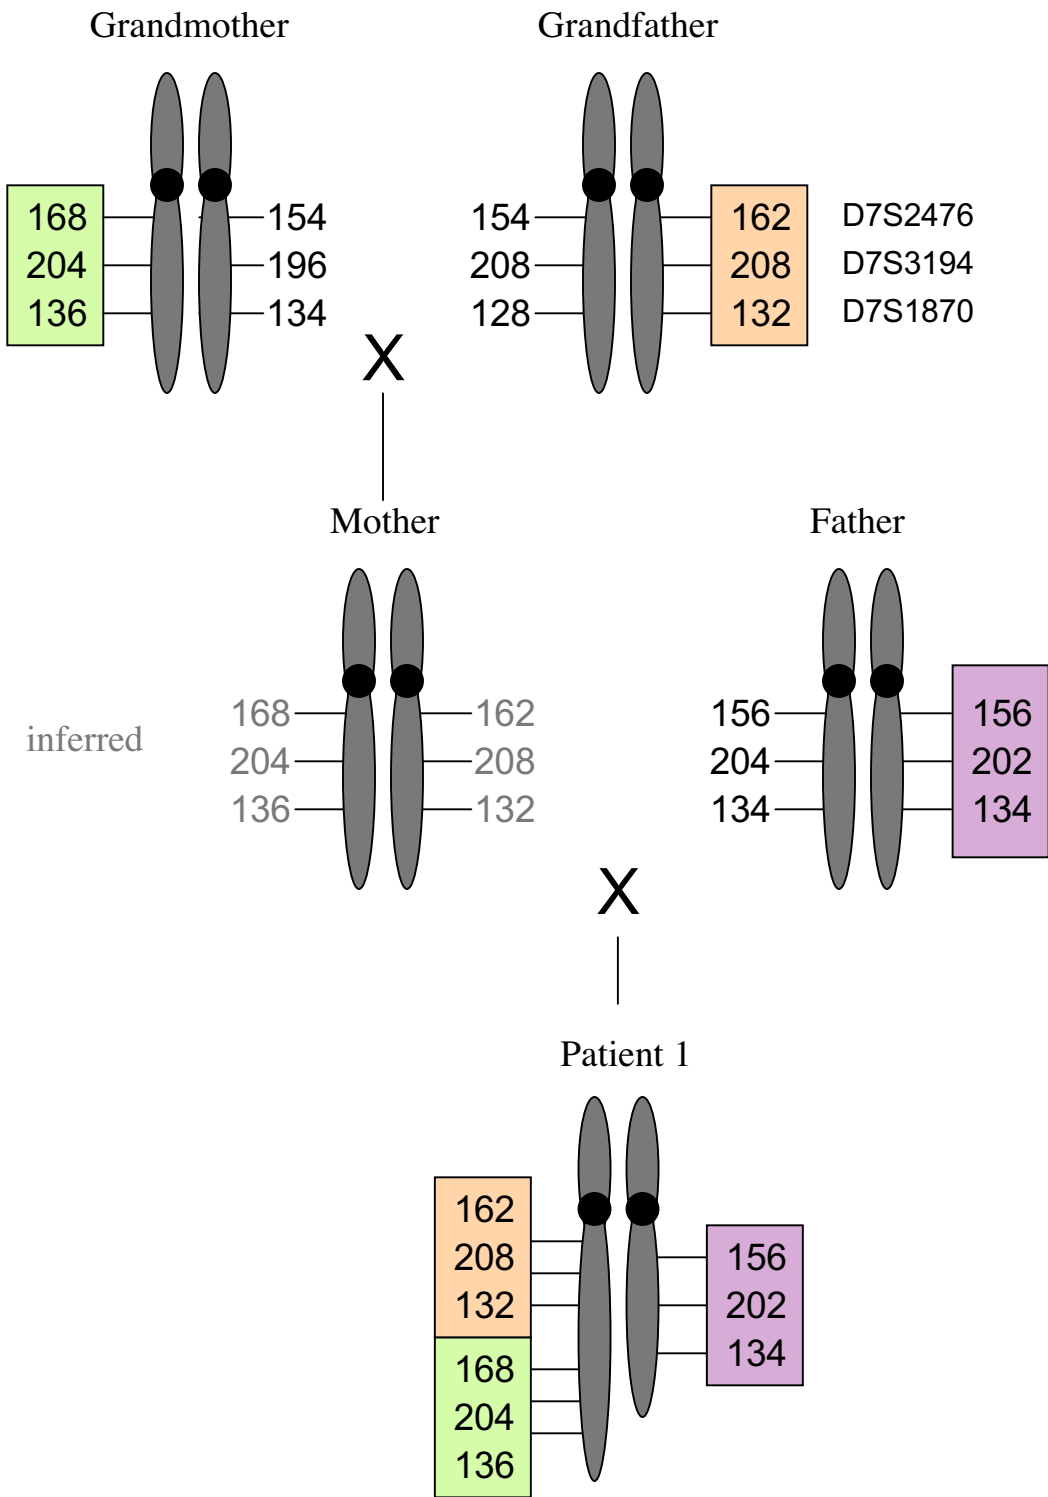

Supplement: nejm_somerville_1694sa1.pdf [file nejm_somerville_1694sa1.pdf]
